# Supplementary material for: The Potential of Mobile Apps for Improving Asthma Self-Management: A Review of Publicly Available and Well-Adopted Asthma Apps
Source: PubMed Central journal article supplement (PMC5559650; doi:10.2196/mhealth.7177), 2017-08-02
Supplement: mhealth_v5i8e113_app2.pdf [file mhealth_v5i8e113_app2.pdf]

## Multimedia Appendix 2

### Exemplary gamification component rating criteria for mHealth asthma apps

| ID  | Game mechanics and dynamics        | Application archetypes in asthma apps                                                                  |
|-----|------------------------------------|--------------------------------------------------------------------------------------------------------|
| G1  | Feedback                           | Comparing asthma control related goals to recorded asthma data and provide feedback                    |
| G2  | Audible feedback                   | Any kind of audible feedback that is related to certain results or behaviors                           |
| G3  | Reminder                           | Reminder for appointments, peak-flow tracking, medications, asthma tests, or other tasks               |
| G4  | Meaning                            | Providing information on asthma such as causes, triggers, symptoms and FAQs                            |
| G5  | Interaction concepts               | Providing an aesthetic user interface combined with a high degree of usability                         |
| G6  | Visually resembling existing games | Resembling common games in a visual way                                                                |
| G7  | Fantasy                            | Using fantasy elements such as fairy tales, speaking animals etc.                                      |
| G8  | Goals                              | Personalized tasks and challenges set to increase asthma control                                       |
| G9  | Time pressure                      | Creating time pressure through timers or countdowns to incentivize certain behaviors                   |
| G10 | Progressive disclosure             | Increasing the difficulty of asthma-related tasks continuously                                         |
| G11 | Ownership                          | Creating a feeling of ownership through functions such as quiz scores or personalized avatars          |
| G12 | Achievement                        | Rewarding accomplished asthma goals, e.g. with virtual gifts, new app features, or High score Rankings |
| G13 | Point system                       | Measuring and comparing the users asthma-related accomplishments with numerical values                 |
| G14 | Badges                             | Awarding batches as a sign for asthma goal accomplishments                                             |
| G15 | Bonus                              | Granting extra rewards for accomplishing a series of asthma-related goals                              |
| G16 | Loss aversion                      | Punishing the user if planned asthma-related behavior is not performed                                 |
| G17 | Status                             | Providing the possibility for social comparison with other users through social network features       |
| G18 | Collaboration                      | Providing the possibility for social interaction with physicians or other users                        |
| G19 | Reputation                         | Providing peer networks for social interaction                                                         |
| G20 | Competition                        | Enabling users to challenge each other in reaching asthma-related goals                                |
| G21 | Envy                               | Providing mechanisms of social comparison that lead to personal envy                                   |
| G22 | Shadowing                          | Giving users the ability to compare their results with previous scores such as Peak Flows rates        |
| G23 | Social facilitation                | Goal-related interactions with physicians                                                              |

|     |                        |                                                                                                                                                       |
|-----|------------------------|-------------------------------------------------------------------------------------------------------------------------------------------------------|
| G24 | Conforming behavior    | Providing peer networks, which enable peer pressure to increase or decrease asthma-related actions                                                    |
| G25 | Leaderboards           | Tracking and ranking of asthma-related accomplishments with leaderboards                                                                              |
| G26 | Altruism               | Enabling users to give away virtual gifts                                                                                                             |
| G27 | Virtual goods          | Enabling users to buy or trade virtual goods                                                                                                          |
| G28 | User levels            | Indicating the users proficiency through different levels                                                                                             |
| G29 | Ideological incentives | Information about controlled and uncontrolled asthma especially regarding the consequences for a patient's quality of life and potential health risks |
| G30 | Virtual character      | The user is represented by a virtual character                                                                                                        |
| G31 | Self-expression        | The user is given the ability for self-expression through customizable functions                                                                      |
