# Supplementary material for: The Potential of Mobile Apps for Improving Asthma Self-Management: A Review of Publicly Available and Well-Adopted Asthma Apps
Source: JMIR Mhealth Uhealth. 2017 Aug 2;5(8):e113. doi: 10.2196/mhealth.7177 (PMC5559650; doi:10.2196/mhealth.7177)
Supplement: Multimedia Appendix 1 [file mhealth_v5i8e113_app1.pdf]

## Multimedia Appendix 1

### Exemplary behavior change technique rating criteria for mHealth asthma apps

| ID  | Behavior change technique                      | Application archetypes in asthma apps                                                                                                                                  |
|-----|------------------------------------------------|------------------------------------------------------------------------------------------------------------------------------------------------------------------------|
| B1  | Provide information about behavior health link | General information about asthma such as causes, triggers, symptoms and FAQs                                                                                           |
| B2  | Provide information on consequences            | Information about controlled and uncontrolled asthma particularly regarding the consequences for a patient's quality of life and potential health risks                |
| B3  | Provide information about others' approval     | The app user can interact with physicians and/or other app users through messages and social network features                                                          |
| B4  | Prompt intention formation                     | Encourage user to engage in health promoting behaviors for asthma                                                                                                      |
| B5  | Prompt barrier identification                  | Identify asthma triggers and provide corresponding information and coping strategies                                                                                   |
| B6  | Provide general encouragement                  | Reward or praise the user for generally trying to improve asthma (control) and for engaging with the app                                                               |
| B7  | Set graded tasks                               | Personalized task and challenges set to increase asthma control                                                                                                        |
| B8  | Provide instruction                            | Instructing the user how to engage with the app and/or asthma control behavior such as emergency plans and usage of medical devices (e.g. peak-flow meter and inhaler) |
| B9  | Model or demonstrate the behavior              | Video tutorials, animations, or visualized descriptions of the instructions described in B8                                                                            |
| B10 | Prompt specific goal setting                   | Setting specific behavior goals to enhance asthma control and provide an adjustable asthma action plan                                                                 |
| B11 | Prompt review of behavioral goals              | Display tracked asthma-related data (e.g. peak flow, medication, symptoms) and behavior goals (e.g. set in B7)                                                         |
| B12 | Prompt self-monitoring of behavior             | Enabling user to track asthma-related data                                                                                                                             |
| B13 | Provide feedback on performance                | Compare asthma control related goals to recorded asthma data and provide feedback                                                                                      |
| B14 | Provide contingent rewards                     | Rewarding and/or praising users for accomplishing health tasks                                                                                                         |
| B15 | Teach to use prompts or cues                   | Remind users of environmental stimuli which are related to asthma behavior (e.g. second-hand smoke)                                                                    |
| B16 | Agree on behavioral contract                   | Setting up an adjustable action plan agreed on with a physician                                                                                                        |
| B17 | Prompt practice                                | Notifications for peak-flow tracking, medications, asthma tests, appointments, or other tasks                                                                          |
| B18 | Use follow-up prompts                          | Asthma notifications, but by messages and/or mails after app is no longer used                                                                                         |
| B19 | Provide opportunities for social comparison    | Provide the possibility for social comparison with other users through social network features                                                                         |

|     |                                       |                                                                                                          |
|-----|---------------------------------------|----------------------------------------------------------------------------------------------------------|
| B20 | Plan social support or social change  | Provide peer networks through social network features and encourage users to use them for social support |
| B21 | Prompt identification as a role model | Empower the user to serve as an role model for asthma control behavior                                   |
| B22 | Prompt self-talk                      | Diaries and journal entries about asthma topics                                                          |
| B23 | Relapse prevention                    | Help users to avoid possibly risky situations for maintaining asthma control                             |
| B24 | Stress management                     | Ease user's stress through relaxation exercises                                                          |
| B25 | Motivational interviewing             | Encourage self-motivating statements in general or in relation to asthma                                 |
| B26 | Time Management                       | Adjustable reminders for asthma tasks                                                                    |
